# Supplementary material for: Unraveling the interaction between doxorubicin and DNA origami nanostructures for customizable chemotherapeutic drug release
Source: bioRxiv or medRxiv preprint supplement (doi:10.1101/2020.05.13.088054), 2021-02-01
Supplement: Supplementary file [file media-1.pdf]

# Supplementary Information for Unraveling the interaction between doxorubicin and DNA origami nanostructures for customizable chemotherapeutic drug release

Heini Ijäs<sup>1,2</sup>, Boxuan Shen<sup>1</sup>, Amelie Heuer-Jungemann<sup>3</sup>, Adrian Keller<sup>4</sup>, Mauri A. Kostianen<sup>1,5</sup>, Tim Liedl<sup>3</sup>,  
Janne A. Ihalainen<sup>2</sup> & Veikko Linko<sup>1,5,\*</sup>

<sup>1</sup>Biohybrid Materials, Department of Bioproducts and Biosystems, Aalto University, P.O. Box 16100, 00076 Aalto, Finland

<sup>2</sup>Nanoscience Center, Department of Biological and Environmental Science, University of Jyväskylä, P.O. Box 35, 40014 Jyväskylä, Finland

<sup>3</sup>Faculty of Physics and Center for NanoScience (CeNS), Ludwig-Maximilians-University, Geschwister-Scholl-Platz 1, 80539 Munich, Germany

<sup>4</sup>Technical and Macromolecular Chemistry, Paderborn University, Warburger Str. 100, 33098 Paderborn, Germany

<sup>5</sup>HYBER Centre, Department of Applied Physics, Aalto University, P.O. Box 15100, 00076 Aalto, Finland

\*Correspondence and requests for materials should be addressed to [veikko.linko@aalto.fi](mailto:veikko.linko@aalto.fi)

## Contents

|                                                                                                                                                                                                     | Page |
|-----------------------------------------------------------------------------------------------------------------------------------------------------------------------------------------------------|------|
| <b>Note S1: DOX fluorescence in different pH buffers<br/>(Supplementary Figure 1)</b>                                                                                                               | 3    |
| <b>Note S2: DOX fluorescence spectrum heterogeneity in the presence of different concentrations of MgCl<sub>2</sub><br/>(Supplementary Figure 2)</b>                                                | 4    |
| <b>Note S3: Full absorption spectra of 2 mM and 200 μM DOX in the aggregation experiment<br/>(Supplementary Figure 3)</b>                                                                           | 5    |
| <b>Note S4: Details of the DNA origami designs<br/>(Supplementary Table 1)</b>                                                                                                                      | 6    |
| <b>Note S5: Spectra and titration curves for the bowtie, double-L, 24HB, and capsule origami<br/>(Supplementary Figure 4)</b>                                                                       | 7    |
| <b>Note S6: Comparison of titration isotherms (<math>\epsilon</math> and <math>\Phi</math>) for all structures<br/>(Supplementary Figure 5)</b>                                                     | 8    |
| <b>Note S7: Density of DOX molecules in the DNA origami structures in the titration experiments<br/>(Supplementary Figure 6)</b>                                                                    | 9    |
| <b>Note S8: Fitting parameters <math>K_{11}</math>, <math>\Phi</math>, and <math>\epsilon</math> for all origami shapes obtained from the 1:2 DOX-DNA binding model<br/>(Supplementary Table 2)</b> | 10   |
| <b>Note S9: AFM images of double-L loaded with DOX and DOX-loading estimation<br/>(Supplementary Figure 7, Supplementary Table 3)</b>                                                               | 11   |
| <b>Note S10: Titration of DOX with ssDNA<br/>(Supplementary Figure 8)</b>                                                                                                                           | 12   |
| <b>Note S11: Kinetics of DOX-DNA association – comparison of different incubation times during the titration experiments<br/>(Supplementary Figure 9)</b>                                           | 13   |
| <b>Note S12: Scattering intensity of the origami<br/>(Supplementary Figure 10)</b>                                                                                                                  | 14   |
| <b>Note S13: Details of DOX-DNA origami samples in the DNase I digestion experiments<br/>(Supplementary Table 4)</b>                                                                                | 15   |
| <b>Note S14: DNase I digestion and DOX release profiles of the 2D structures over 41 h incubation<br/>(Supplementary Figure 11)</b>                                                                 | 16   |
| <b>Note S15: 24HB design and staple sequences<br/>(Supplementary Figures 12–14, Supplementary Table 5)</b>                                                                                          | 17   |

## Note S1: DOX fluorescence in different pH buffers

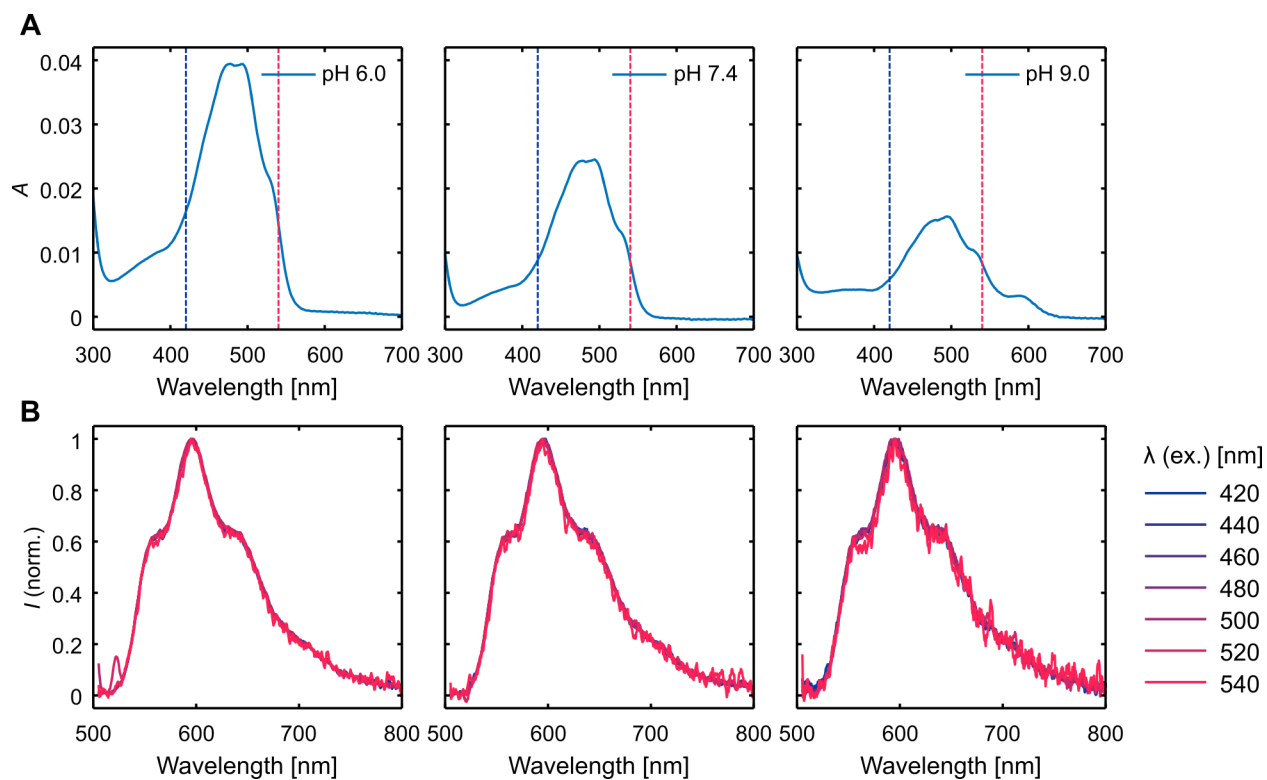

**Supplementary Figure 1.** Comparison of the shape of the absorption and emission spectra of 3  $\mu$ M DOX in 40 mM Tris-HCl buffer at pH 6.0, 7.4, and 9.0 prepared without magnesium. **(A)** Absorption spectra at pH 6.0, 7.4, and 9.0. The colored dashed lines indicate the excitation wavelength range applied in Figure B. **(B)** The shape of the emission spectra collected with excitation wavelengths in the range of 420–540 nm. All spectra are normalized to the maximum value. While the emission intensity of DOX depends on the excitation wavelength and the pH of the sample (lower emission intensity at higher pH), the shape of the emission spectrum does not change, indicating that the full emission originates from a homogeneous group of fluorescent molecules.

**Note S2: DOX fluorescence spectrum heterogeneity in the presence of different concentrations of MgCl<sub>2</sub>**

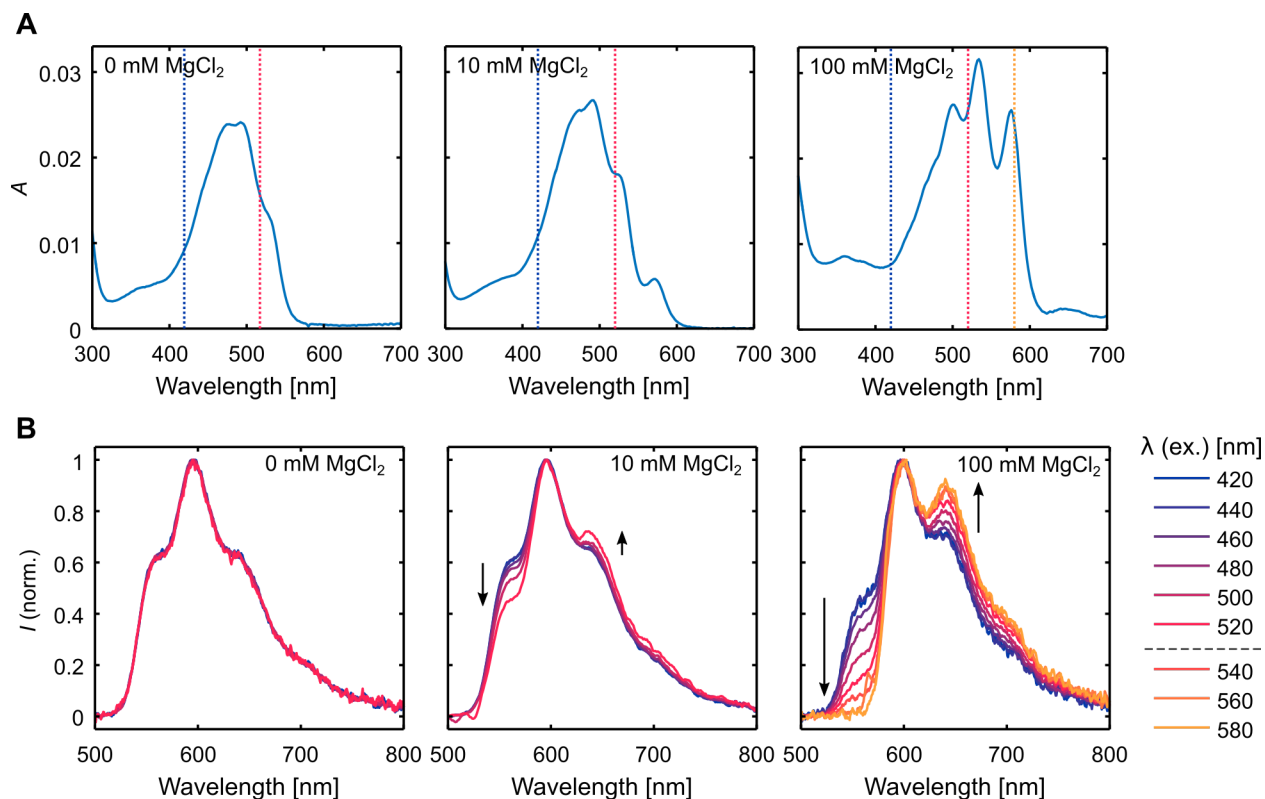

**Supplementary Figure 2.** Absorption and emission spectra of 3  $\mu$ M DOX in 40 mM Tris pH 7.4 supplemented with different concentrations of MgCl<sub>2</sub>. **(A)** Absorption spectra measured at 0, 10, or 100 mM MgCl<sub>2</sub> concentration (the concentration indicated in the upper-left corner of each figure). The excitation wavelength range applied for the emission spectra in Figure B (420–520 nm, and 520–580 nm) are indicated with the colored dashed lines. **(B)** Heterogeneity of the emission spectrum of DOX caused by Mg<sup>2+</sup> complexation. The arrows indicate the changes observed in the shape of the spectrum relative to the spectrum collected with 420 nm excitation when the excitation wavelength changes. For 0 mM and 10 mM MgCl<sub>2</sub> samples, the shape of the emission spectrum is compared between 420–520 nm excitation. For the 100 mM MgCl<sub>2</sub> sample, additional excitation wavelengths 540–580 are included. The emission spectrum collected with 580 nm excitation originates purely from the DOX-Mg<sup>2+</sup> complexes, as pure DOX (0 mM MgCl<sub>2</sub> sample) does not absorb light at this wavelength. All spectra have been normalized to the intensity at emission maximum.

**Note S3: Full absorption spectra of 2 mM and 200  $\mu$ M DOX in the aggregation experiment**

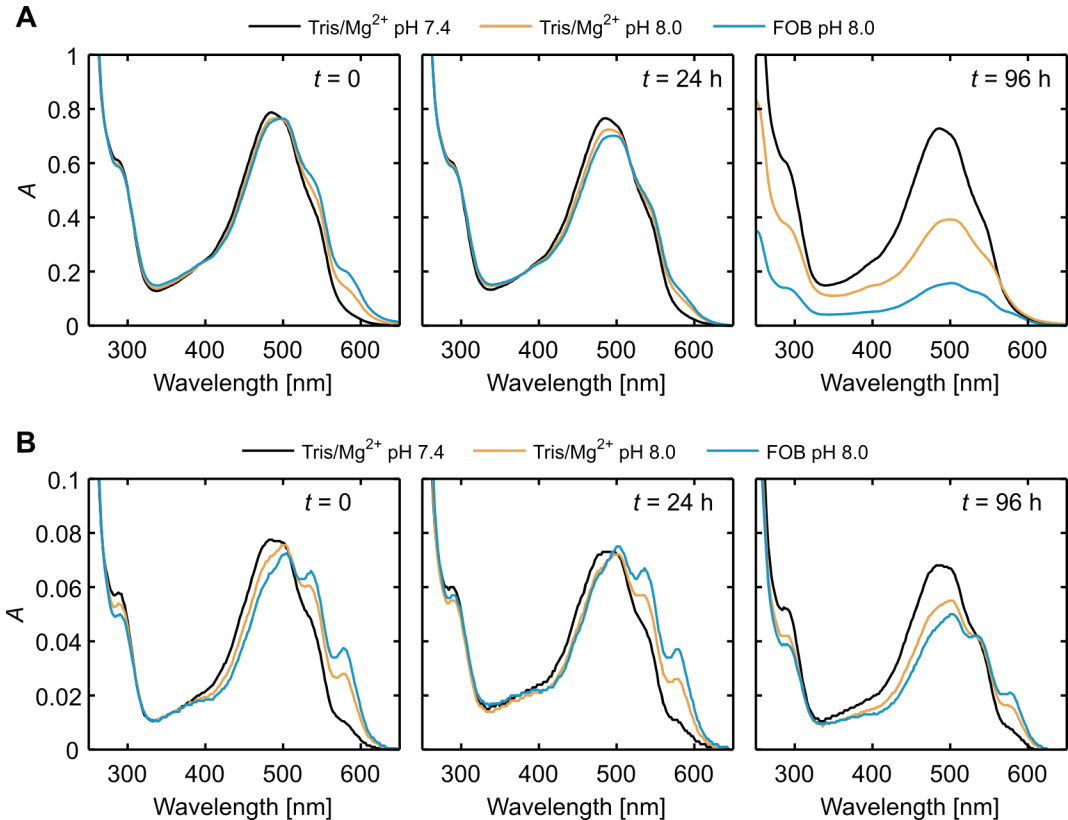

**Supplementary Figure 3.** Absorption spectra measured from the supernatant of DOX samples containing initially either 2 mM or 200  $\mu$ M DOX, after incubation at RT for 0, 24, or 96 h in different buffers and centrifugation at 14,000 *g* for removing the insoluble fraction. Tris/Mg<sup>2+</sup> denotes 40 mM Tris, 10 mM MgCl<sub>2</sub>. FOB = 1  $\times$  TAE, 12.5 mM MgCl<sub>2</sub>. **(A)** 2 mM DOX. **(B)** 200  $\mu$ M DOX.

## Note S4: Details of the DNA origami designs

**Supplementary Table 1.** Nucleotide amounts in the studied DNA origami designs ( $N_{\text{total}}$ ) and the fractions of unpaired ( $N_{\text{ss}}$ ) and hybridized ( $N_{\text{ds}}$ ) nucleotides. Molar extinction coefficients per nucleotide at 260 nm ( $\epsilon_{260}/\text{nt}$ ) have been calculated for each shape according to Equation 1.

| Origami shape | $N_{\text{total}}$ | $N_{\text{ds}}$ | $N_{\text{ss}}$ | $N_{\text{ds}}/N_{\text{total}}$<br>(%) | $\epsilon_{260}/\text{nt}$<br>( $\text{cm}^{-1}\text{M}^{-1}$ ) |
|---------------|--------------------|-----------------|-----------------|-----------------------------------------|-----------------------------------------------------------------|
| Triangle      | 14,516             | 14,464          | 52              | 99.6                                    | 6,700                                                           |
| Bowtie        | 15,039             | 13,948          | 1,091           | 92.7                                    | 6,900                                                           |
| Double-L      | 15,193             | 14,324          | 869             | 94.3                                    | 6,900                                                           |
| 24HB          | 15,504             | 15,120          | 384             | 97.5                                    | 6,800                                                           |
| Capsule       | 16,732             | 14,704          | 2,028           | 87.9                                    | 7,000                                                           |

## Note S5: Spectra and titration curves for the bowtie, double-L, 24HB, and capsule origami

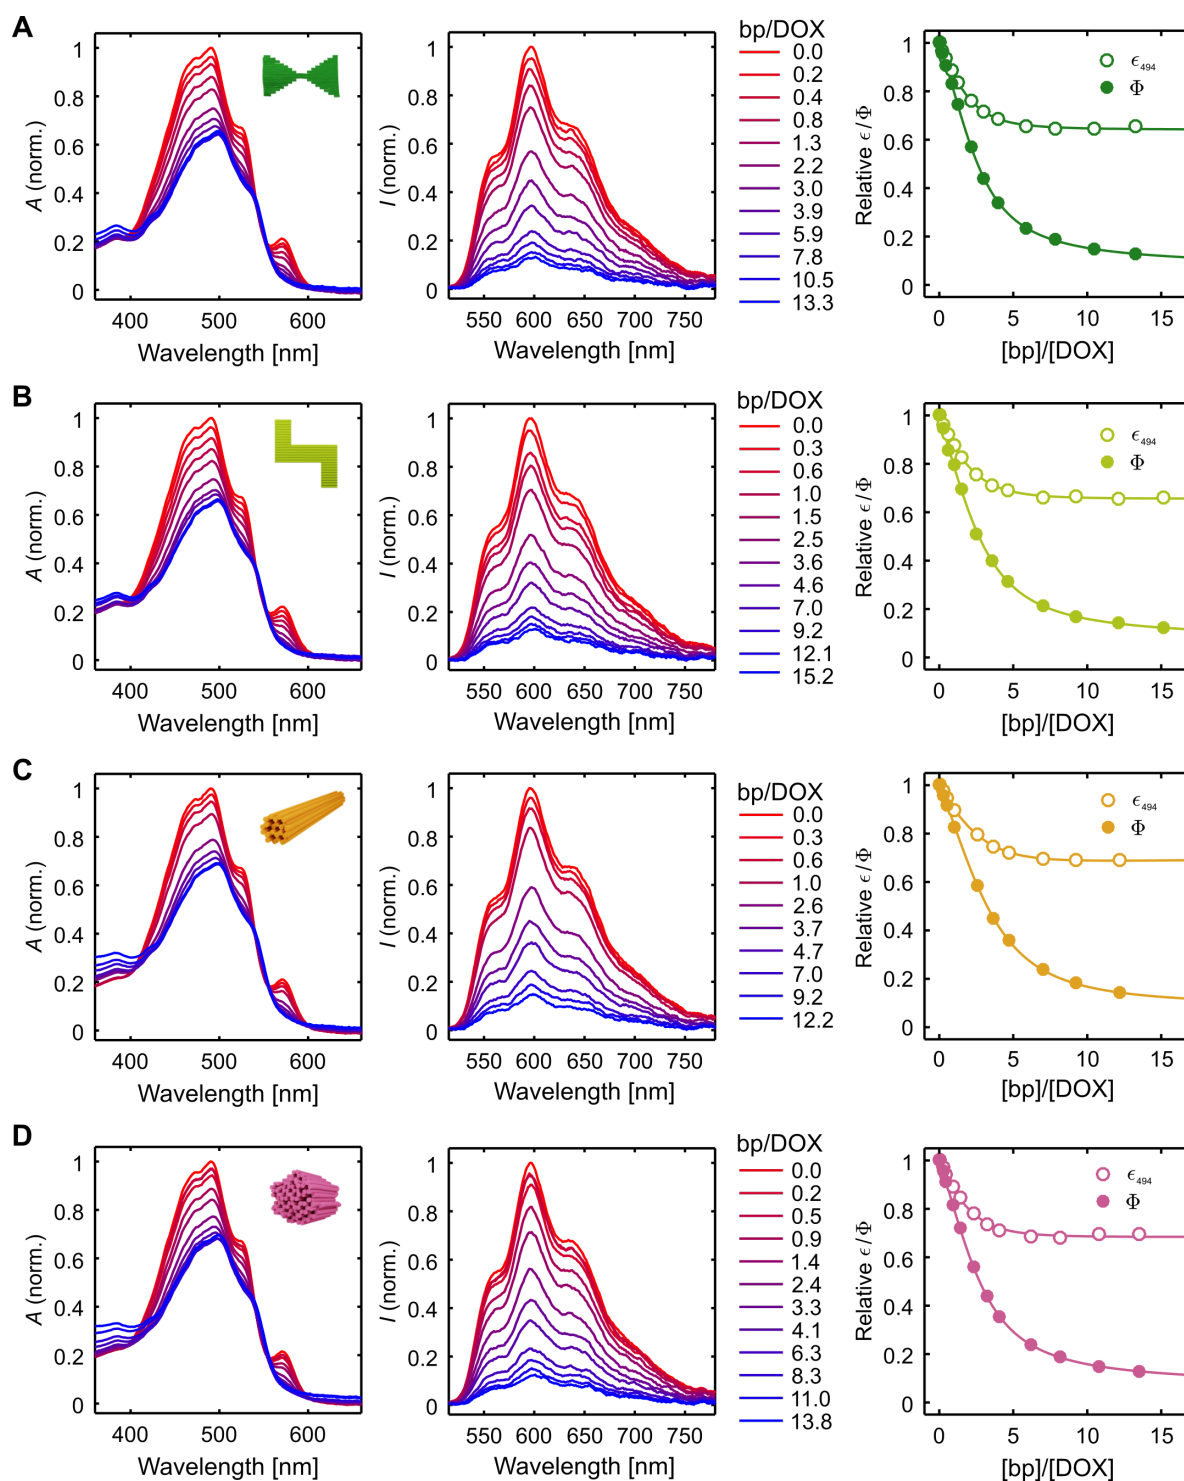

**Supplementary Figure 4.** DOX absorption spectra (left panel), fluorescence emission spectra (middle panel), and the dependence of DOX extinction coefficient at 494 nm ( $\epsilon_{494}$ ) and fluorescence quantum yield ( $\Phi$ ) on the amount of added DNA (right panel) for all studied DNA origami shapes. For both the absorption and emission spectra, the molar ratio of DNA base pairs and DOX (bp/DOX) is indicated in the legend. The concentration of DOX is 3  $\mu$ M. The emission spectra have been collected after 494 nm excitation and corrected for the decrease of  $\epsilon_{494}$ . The titration isotherms on the right panel have been fitted with a 1:2 molecular binding model. The fitting parameters are listed in Supplementary Table 2. (A) Bowtie. (B) Double-L. (C) 24HB. (D) Capsule.

## Note S6: Comparison of titration isotherms ( $\epsilon$ and $\Phi$ ) for all structures

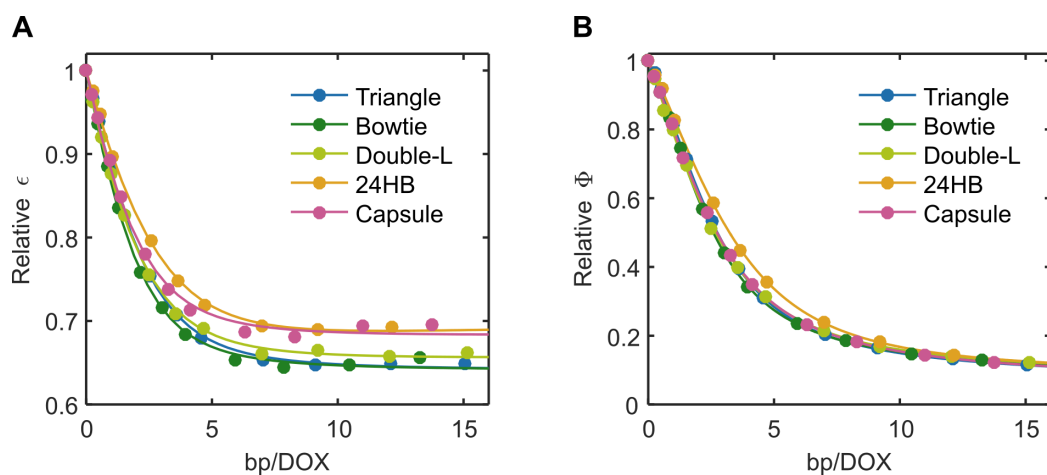

**Supplementary Figure 5.** Comparison of the effect of titrating DOX with the origami structures in terms of the relative decrease of the molar extinction coefficient at 494 nm ( $\epsilon_{494}$ ) and fluorescence quantum yield ( $\Phi$ ). **(A)** Relative decrease of  $\epsilon_{494}$  of DOX upon addition of DNA origami. **(B)** Relative decrease of  $\Phi$  measured with 494 nm excitation.



## Note S7: Density of DOX molecules in the DNA origami structures in the titration experiments

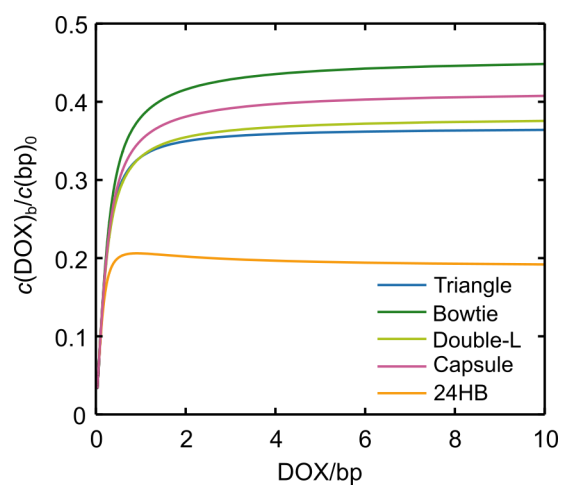

**Supplementary Figure 6.** Density of DOX molecules in the DNA origami structures in the titration experiments expressed as the number of bound DOX molecules per base pair of DNA ( $c(\text{DOX})_b / c(\text{bp})_0$ ). The molar ratio DOX/bp on the  $x$  axis refers to the total concentration of DOX and base pairs in the samples ( $c(\text{DOX})_0$  and  $(\text{bp})_0$ ).

## Note S8: Fitting parameters $K$ , $\Phi$ , and $\epsilon$ for all origami shapes obtained from the 1:2 DOX-DNA binding model

**Supplementary Table 2.** Association constants ( $K_{11}$ ,  $K_{12}$ ), fluorescence quantum yields ( $\Phi_{11}$ ,  $\Phi_{12}$ ), and molar extinction coefficients at 494 nm ( $\epsilon_{11}$ ,  $\epsilon_{12}$ ) for the two distinct DOX-DNA complexes. The values have been obtained by fitting the titration data with the 1:2 molecular binding model as described in the Methods section.  $\Phi_{11}$ ,  $\Phi_{12}$ ,  $\epsilon_{11}$ , and  $\epsilon_{12}$  are presented relative to the extinction coefficient and quantum yield of free DOX ( $\epsilon_0$  and  $\Phi_0$ ).

| Origami shape | $K_{11}$<br>( $\times 10^5 \text{M}^{-1}$ ) | $K_{12}$<br>( $\times 10^5 \text{M}^{-1}$ ) | $\Phi_{11}/\Phi_0$<br>(%) | $\Phi_{12}/\Phi_0$<br>(%) | $\epsilon_{11}/\epsilon_0$<br>(%) | $\epsilon_{12}/\epsilon_0$<br>(%) |
|---------------|---------------------------------------------|---------------------------------------------|---------------------------|---------------------------|-----------------------------------|-----------------------------------|
| Triangle      | $1.93 \pm 0.06$                             | $3.07 \pm 0.06$                             | $62 \pm 3$                | $6.2 \pm 0.3$             | $62 \pm 3$                        | $64 \pm 3$                        |
| Bowtie        | $2.81 \pm 0.12$                             | $2.95 \pm 0.07$                             | $64 \pm 4$                | $6.9 \pm 0.4$             | $64 \pm 4$                        | $64 \pm 4$                        |
| Double-L      | $2.0 \pm 0.2$                               | $2.15 \pm 0.14$                             | $47 \pm 5$                | $7.0 \pm 0.7$             | $60 \pm 6$                        | $66 \pm 7$                        |
| 24HB          | $0.77 \pm 0.03$                             | $2.59 \pm 0.09$                             | $27.8 \pm 1.2$            | $8.2 \pm 0.4$             | $42 \pm 2$                        | $71 \pm 3$                        |
| Capsule       | $2.36 \pm 0.05$                             | $2.26 \pm 0.03$                             | $57 \pm 6$                | $1.3 \pm 0.2$             | $64.2 \pm 1.5$                    | $69 \pm 2$                        |

## Note S9: AFM images of double-L loaded with DOX and DOX-loading estimation

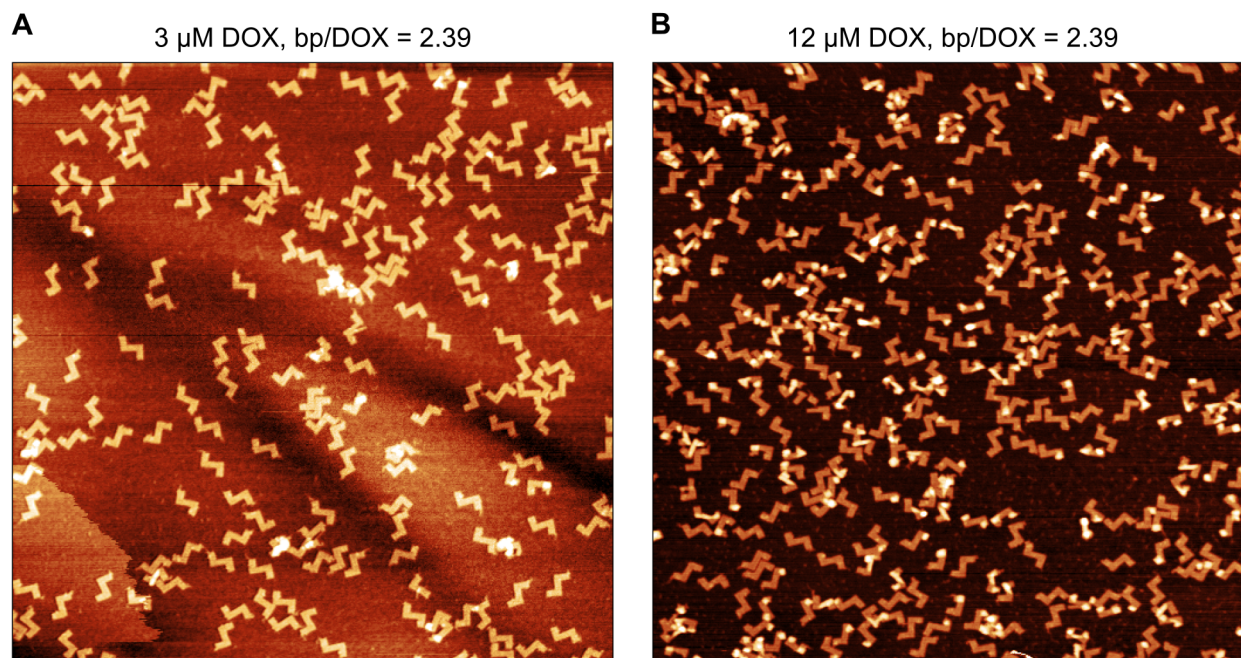

**Supplementary Figure 7.** AFM images of double-L origami loaded with DOX at two different sample concentrations while keeping the same molar ratio of DNA base pairs (bp) and DOX (bp/DOX). The edge of each figure is 3  $\mu\text{M}$  in length. **(A)** DOX-origami sample prepared with a base pair concentration ( $c(\text{bp})_0$ ) of 7.16  $\mu\text{M}$  and DOX concentration ( $c(\text{DOX})_0$ ) of 3  $\mu\text{M}$ . **(B)** DOX-origami sample prepared at 4 times higher concentration of both DOX and double-L origami than Figure A ( $c(\text{bp})_0 = 28.7 \mu\text{M}$ ,  $c(\text{DOX})_0 = 12 \mu\text{M}$ ). While the bp/DOX ratio is identical in both cases, the higher total concentration of both DNA origami and DOX in Figure B can be seen to lead to an increased fraction of twisted DNA origami shapes, indicating higher DOX binding density through intercalation. The analysis result is in line with the theoretical values predicted by the 1:2 binding model (Supplementary Table 3).

**Supplementary Table 3.** Theoretical prediction of the density of loaded DOX (number of bound DOX molecules per base pair,  $c(\text{DOX})_b/c(\text{bp})_0$ ) in the double-L structures shown in Supplementary Figure 7 based on the 1:2 binding model.

|                                     | 3 $\mu\text{M}$ DOX | 12 $\mu\text{M}$ DOX |
|-------------------------------------|---------------------|----------------------|
| $c(\text{DOX})_0$ ( $\mu\text{M}$ ) | 3.0                 | 12                   |
| $c(\text{bp})_0$ ( $\mu\text{M}$ )  | 7.16                | 28.7                 |
| bp/DOX                              | 2.39                | 2.39                 |
| $c(\text{DOX})_b$ ( $\mu\text{M}$ ) | 1.90                | 10.6                 |
| $c(\text{DOX})_b/c(\text{bp})_0$    | 0.27                | 0.37                 |

## Note S10: Titration of DOX with ssDNA

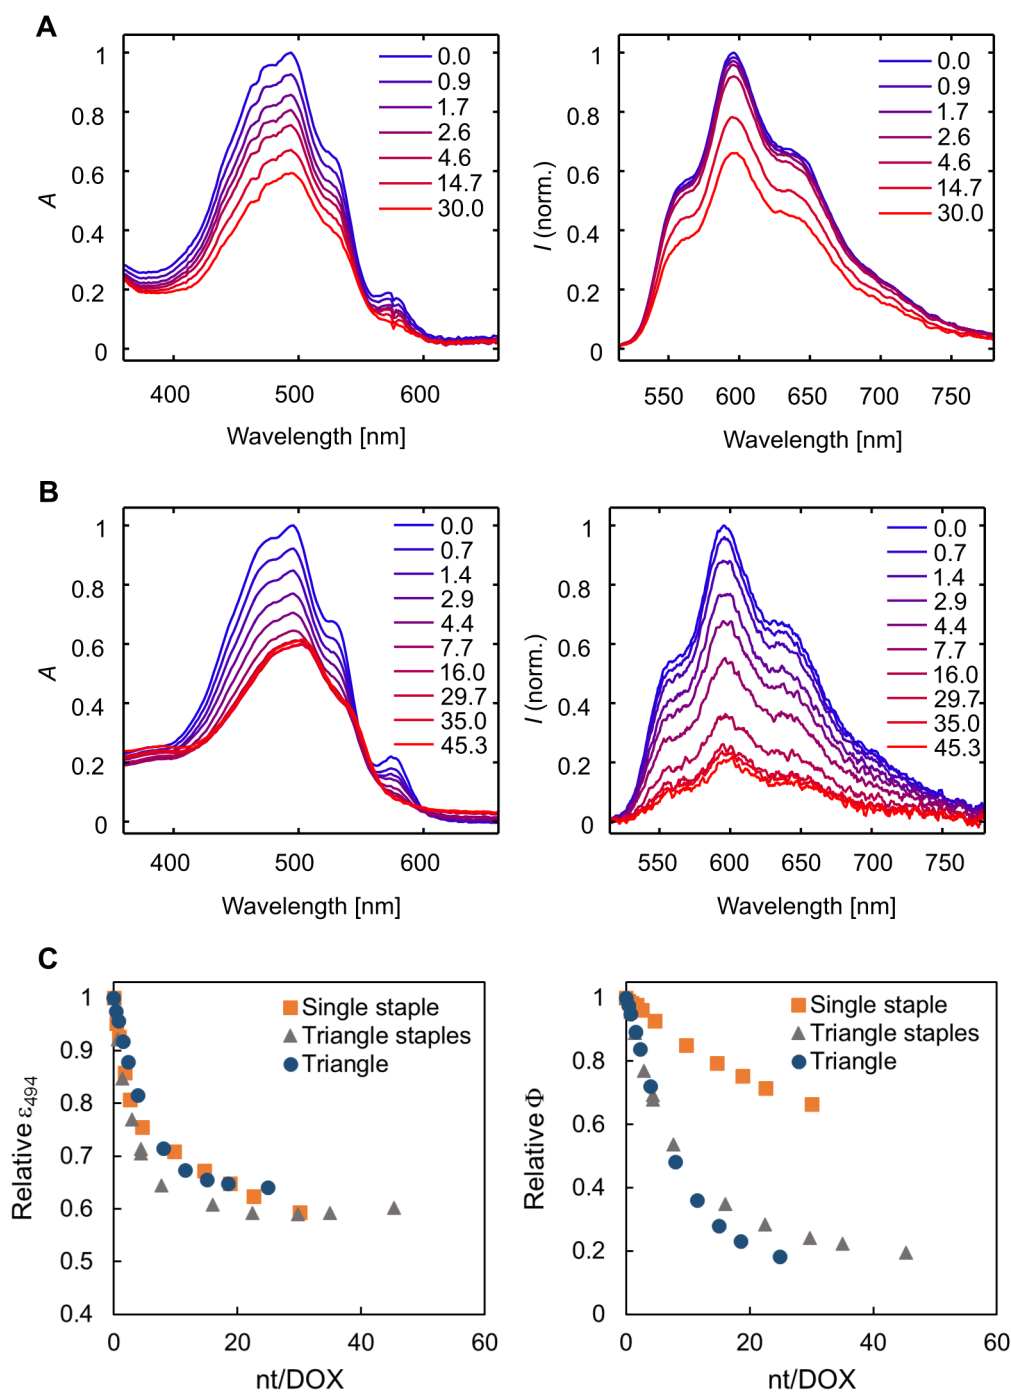

**Supplementary Figure 8.** Titration of 3  $\mu\text{M}$  DOX with single- and double-stranded DNA. (A) Titration with a single oligonucleotide with a low probability of self-hybridization (5'-GAACAACGCTCCAACCATCGC-3'). Absorption spectrum of DOX is shown in the left panel and fluorescence emission in the right panel. The emission intensities have been collected with 494 nm excitation and corrected for the decrease of  $\epsilon_{494}$  to represent the quantum yield of the DOX molecules ( $\Phi$ ). The legends in both figures denote the molar ratio of nucleotides and DOX (nt/DOX) for each spectrum. The concentration of nucleotides ( $c(\text{nt})_0$ ) has been calculated from the measured  $A_{260}$  value and a molar extinction coefficient for 100% single-stranded DNA,  $\epsilon_{260} = 10,000 \text{ M}^{-1} \text{ cm}^{-1}$ . (B) Titration with a mixture of the 232 staple oligonucleotides used for folding the triangle origami, presented as Figure A. While the mixture of staple strands can be expected to contain a high number of hybridized dsDNA regions, the exact fraction of ssDNA and dsDNA nucleotides in the sample is unknown. The nt/DOX ratios presented in the legends have been calculated from the measured  $A_{260}$  value and a molar extinction coefficient for 100% single-stranded DNA,  $\epsilon_{260} = 10,000 \text{ M}^{-1} \text{ cm}^{-1}$ . (C) The relative decrease of  $\epsilon_{494}$  and  $\Phi$  compared upon titration with a single oligonucleotide (Figure A), the triangle staple oligonucleotide mixture (Figure B), and the folded triangle origami (Figure 3B in the main text).

## Note S11: Kinetics of DOX-DNA association – comparison of different incubation times during the titration experiments

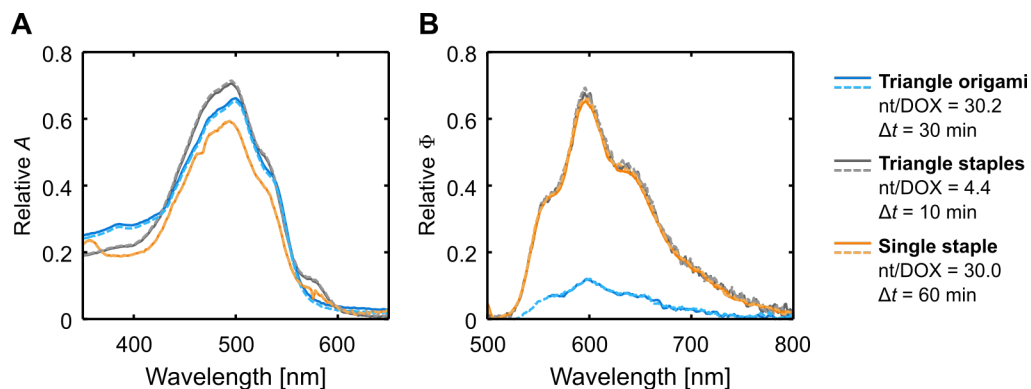

**Supplementary Figure 9.** Comparison of the effect of incubation time on the spectra collected during titration of 3  $\mu$ M DOX with the triangle origami, triangle origami staple mixture, or a single ssDNA staple oligonucleotide. For each sample, the spectra shown with solid lines have been collected after a 2.5-min incubation. The spectra plotted with dashed lines have been collected after continuing the incubation for a time indicated with the  $\Delta t$ . The DNA content in the samples is shown as the ratio between the total amount of nucleotides and the DOX concentration ( $nt/DOX$ ). **(A)** Absorption spectra, with  $A$  values normalized to the spectrum of free 3  $\mu$ M DOX. **(B)** Emission spectra depicting the relative fluorescence quantum yield ( $\Phi$ ) relative to free DOX.

## Note S12: Scattering intensity of the origami

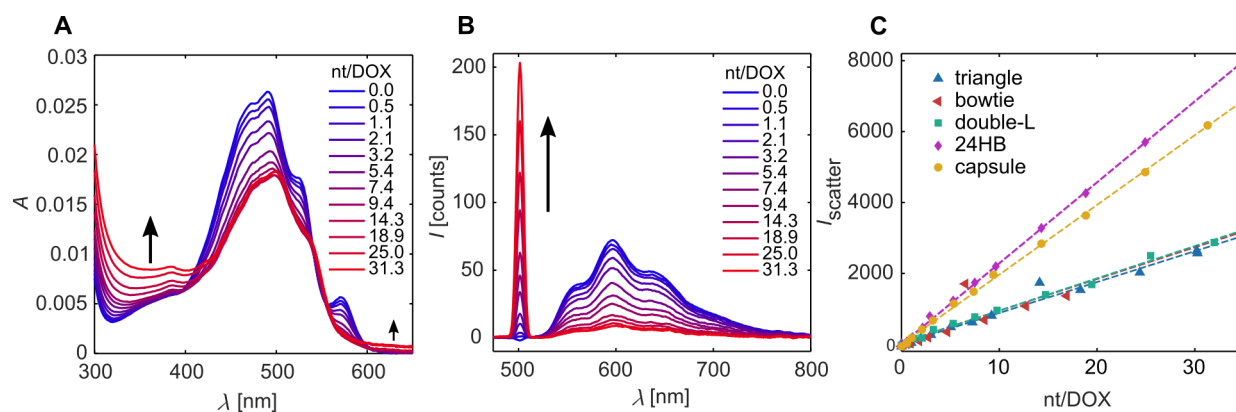

**Supplementary Figure 10.** Light scattering caused by the DOX-loaded DNA origami. **(A)** Absorption spectrum of a sample containing DOX and an increasing concentration of the capsule origami. Absorption baseline shift upwards during the titration is indicated with the black arrows and shows the increased light scattering in the sample. The amount of DNA origami is described as the total concentration of nucleotides in the sample, and indicated in the legend as the molar ratio of nucleotides vs. DOX (nt/DOX) ( $c(\text{DOX}) = 3 \mu\text{M}$ ). **(B)** Scattered light detected as an increasing intensity of excitation light (494 nm) in the fluorescence emission measurement ( $90^\circ$  detection relative to the excitation beam). The spectra are collected for  $3 \mu\text{M}$  DOX upon titration with the capsule origami. **(C)** Intensity of scattered light during titration of DOX with different origami shapes (increasing nt/DOX ratio) shows the stronger light scattering detected with the 3D structures. The scattering intensities have been obtained from the emission spectra by integrating the excitation light peak.

## Note S13: Details of DOX-DNA origami samples in the DNase I digestion experiments

**Supplementary Table 4.** Composition of the DNA origami-DOX samples in the DNase I digestion experiments before addition of DNase I. The DOX quantum yields relative to free DOX references ( $\Phi/\Phi_{\text{ref}}$ ) and the base pair/DOX molar ratios (bp/DOX) are based on the measured DNA absorbance and DOX fluorescence intensities. The concentrations of free DOX ( $c(\text{DOX})_{\text{ub}}$ ), bound DOX ( $c(\text{DOX})_{\text{b}}$ ), and bound DOX molecules bound per base pair of DNA ( $c(\text{DOX})_{\text{b}}/c(\text{bp})_0$ ) have been calculated according to Equation 6 and the parameters in Supplementary Table 2.

| <b>3 <math>\mu\text{M}</math> DOX</b> |                          |                             |                                                  |                            |                                           |
|---------------------------------------|--------------------------|-----------------------------|--------------------------------------------------|----------------------------|-------------------------------------------|
|                                       | $\Phi/\Phi_{\text{ref}}$ | bp/DOX<br>( $\mu\text{M}$ ) | $c(\text{DOX})_{\text{ub}}$<br>( $\mu\text{M}$ ) | $c(\text{DOX})_{\text{b}}$ | $c(\text{DOX})_{\text{b}}/c(\text{bp})_0$ |
| Triangle                              | 0.29                     | 3.53                        | 0.62                                             | 2.38                       | 0.23                                      |
| Bowtie                                | 0.26                     | 3.35                        | 0.53                                             | 2.47                       | 0.25                                      |
| Double-L                              | 0.24                     | 3.39                        | 0.71                                             | 2.29                       | 0.23                                      |
| Capsule                               | 0.29                     | 5.75                        | 0.25                                             | 2.75                       | 0.16                                      |
| 24HB                                  | 0.26                     | 6.40                        | 0.47                                             | 2.53                       | 0.13                                      |

  

| <b>6 <math>\mu\text{M}</math> DOX</b> |                          |                             |                                                  |                            |                                           |
|---------------------------------------|--------------------------|-----------------------------|--------------------------------------------------|----------------------------|-------------------------------------------|
|                                       | $\Phi/\Phi_{\text{ref}}$ | bp/DOX<br>( $\mu\text{M}$ ) | $c(\text{DOX})_{\text{ub}}$<br>( $\mu\text{M}$ ) | $c(\text{DOX})_{\text{b}}$ | $c(\text{DOX})_{\text{b}}/c(\text{bp})_0$ |
| Triangle                              | 0.45                     | 1.76                        | 2.03                                             | 3.97                       | 0.38                                      |
| Bowtie                                | 0.40                     | 1.67                        | 1.87                                             | 4.13                       | 0.41                                      |
| Double-L                              | 0.39                     | 1.70                        | 2.80                                             | 3.20                       | 0.31                                      |
| Capsule                               | 0.39                     | 2.87                        | 0.86                                             | 5.14                       | 0.30                                      |
| 24HB                                  | 0.41                     | 3.20                        | 1.38                                             | 4.62                       | 0.24                                      |

## Note S14: DNase I digestion and DOX release profiles of the 2D structures over 41 h incubation

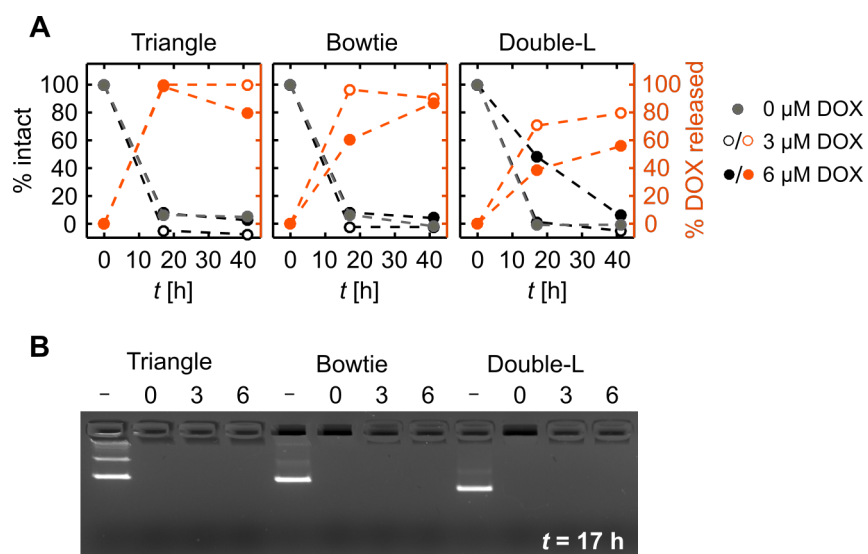

**Supplementary Figure 11.** DNase I digestion of the 2D origami structures over 41 h incubation in the presence of 28 U/mL DNase I and either 0, 3, or 6  $\mu$ M DOX. **(A)** Digestion and DOX release profiles based on the  $A_{260}$  readings and the quantum yield of DOX relative to free DOX reference at the same concentration. The structural integrity of the DNA origami (% intact), as determined from the increase of the  $A_{260}$  signal, is shown with the gray triangle markers for the samples without DOX, and with the empty and filled black markers for the samples containing DOX at either 3 or 6  $\mu$ M concentration. For the samples with 3 and 6  $\mu$ M DOX, the orange markers depict the fraction of released DOX molecules relative to the initial concentration of bound DOX molecules. **(B)** Agarose gel electrophoresis (AGE) analysis result of the 2D origami shapes after 17 h incubation with DNase I. The first lane for each sample (-) contains the DNA origami without DNase I or DOX; the lanes marked with 0, 3, and 6 contain the indicated concentration of DOX in  $\mu$ M and 28.2 U/mL of DNase I.



**Note S15: 24HB design and staple sequences**

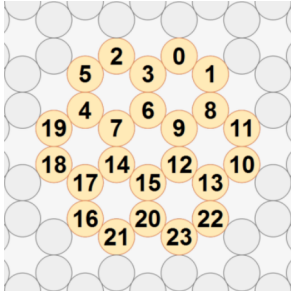

**Supplementary Figure 12.** Cross-section of the 24 helix bundle (24HB) design and the helix numbers.

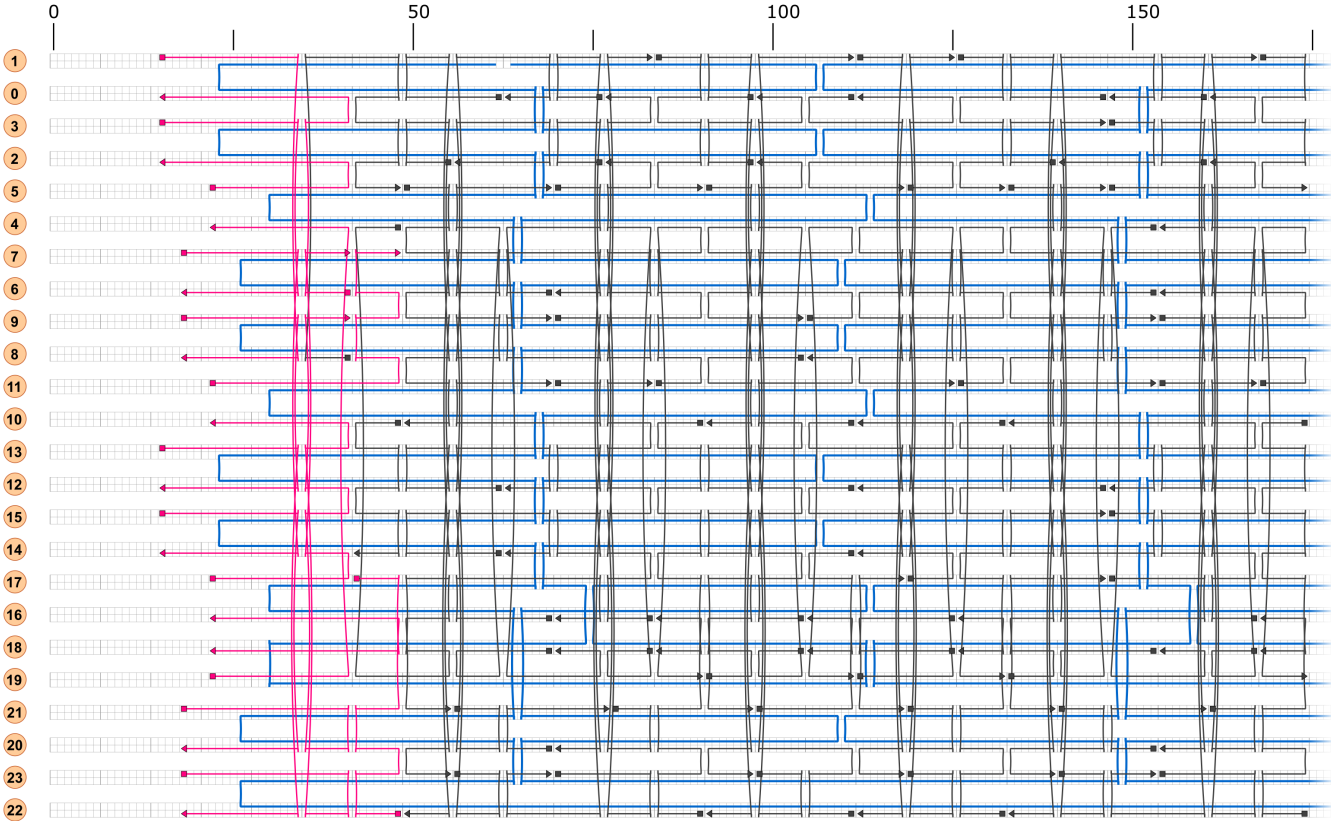

**Supplementary Figure 13.** Part 1 (grid positions 15–174) of the 24HB CaDNAo blueprint. The helix numbers are shown on the left side of the figure, and the numbers on top indicate the grid position. The 7,560-nt scaffold is shown in blue, fully complementary scaffold strands in dark gray, and scaffold strands containing 8× poly-T overhang sequences in pink.

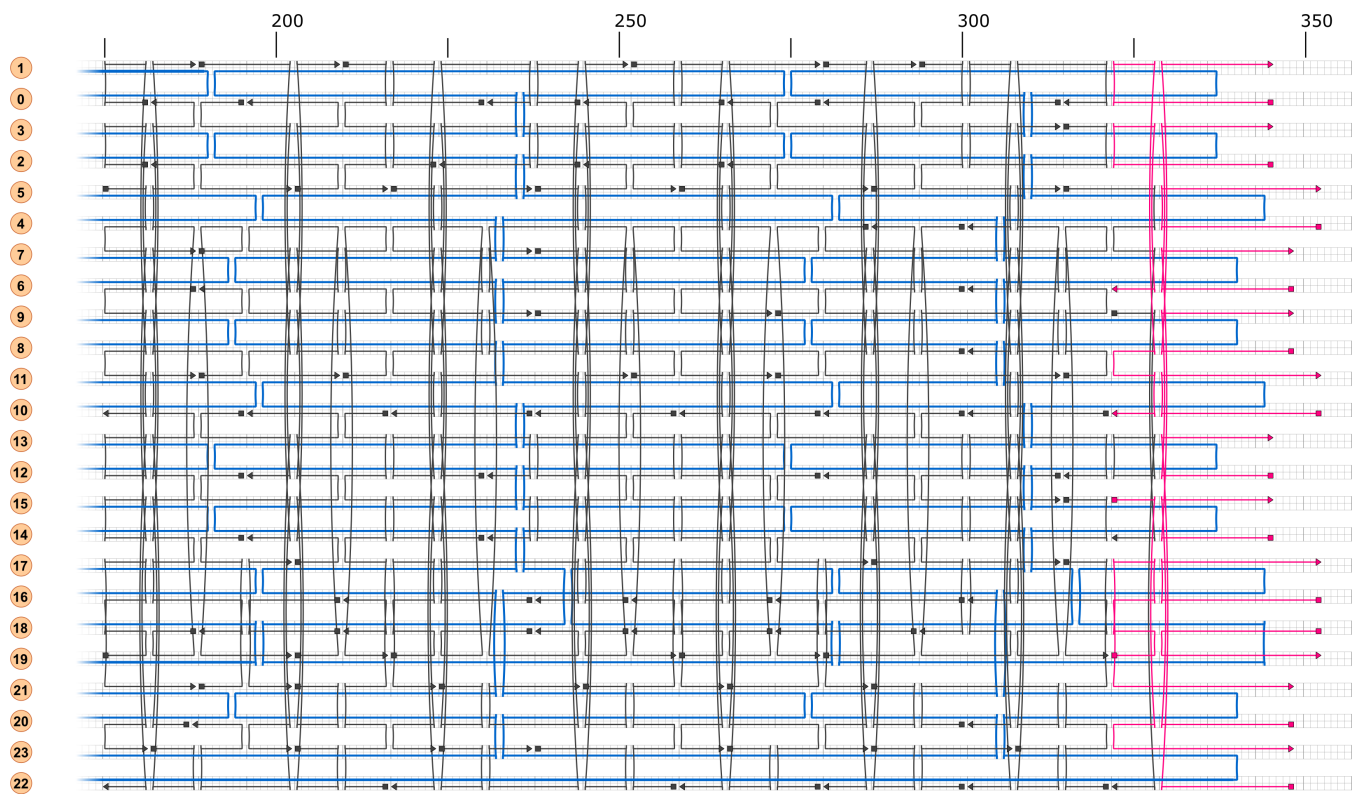

Supplementary Figure 14. Part 2 (grid positions 175–352) of the 24HB CaDNAo blueprint.

**Supplementary Table 5.** Staple strand sequences for the 24HB design. Nucleotide bases complementary to the scaffold strand are written in capital letters. The 8 × poly-T overhang sequences in staples #174–202 have been indicated by lowercase letters. Start pos. and end pos. indicate the positions of the staple strand termini in the caDNAo design (helix number[grid position]).

| #  | Start pos. | End pos. | Sequence                                           |
|----|------------|----------|----------------------------------------------------|
| 1  | 3[147]     | 2[140]   | TTGAAATTCAAATCCAATCGC                              |
| 2  | 6[153]     | 20[154]  | CTCATTTATCTAATTTACGAGAGAGAGAATTTATCAAAGACA         |
| 3  | 22[279]    | 9[272]   | GACAGTAGTTGGGAGAGGCTTGAGATGGGCAAAGGGAAGTTAGCTTGA   |
| 4  | 21[78]     | 1[83]    | GAAGGTAGATAATCAGTCACGGATTATATCCTGAGCAAATTTACGTGA   |
| 5  | 1[210]     | 5[216]   | GTACCGCTAAGTATTTTTGCTTTAAGAGGCCCCCT                |
| 6  | 5[238]     | 18[238]  | TTTTGTCGAGAATAGAAAGTACCGGAACGAGGCGCATGAAAC         |
| 7  | 10[48]     | 14[42]   | TATCCGCTCGAATTGTGCTTGGACCTCCTTGAATC                |
| 8  | 22[258]    | 16[252]  | ATCGCACGCTCATTTCAACTTGAAACACACGTAAC                |
| 9  | 5[70]      | 18[70]   | GGCGCTAGCGTACTATGGTCAAATACCGAACGAACGCACGTG         |
| 10 | 10[195]    | 20[188]  | GAAGCCTTTCCAGAGCCACCAGCCATTCGCCATTCGGTTTACAAATACAT |
| 11 | 5[287]     | 5[286]   | CGGAAGCTTAATTGCTCCTTTTGATAATTCTGTATGGCAGAC         |
| 12 | 7[238]     | 21[244]  | ACTAAAGCGATTATACGAAGGTGTGAATTACCTAGGAATAAGGCTTGCC  |
| 13 | 20[153]    | 21[160]  | CCACGACGCTTAAGACTCCTT                              |
| 14 | 17[287]    | 0[280]   | CCAAAAGATAACCCAAGACTTTCAAAAATGCGGATTAGCTCAACATGTT  |
| 15 | 21[140]    | 15[146]  | GATGATGATTATCATACTTT                               |
| 16 | 19[217]    | 21[223]  | TCCATGTATTTGTAGTCACCAAGCAAACTTGAGC                 |
| 17 | 21[189]    | 7[188]   | AATACAGACCGAGGAAACGCACAAAGTTCGTCAAATCGGCTG         |
| 18 | 0[195]     | 12[196]  | GTATCAGAGAGGATTAGGATTCGTCATACAAACAAAATCAC          |
| 19 | 2[265]     | 22[259]  | ACAGCCCCTACAACAGGCTCCCTTAAACTCCATTACTAAAGACAGGAAG  |
| 20 | 0[181]     | 10[175]  | TTGAGAAGCCAACGCAAGCAAAACCTCCAGATTAG                |
| 21 | 2[181]     | 22[175]  | AGTACCGTCGAGCCAAGAACGTATCGTAATTTGCGCTAACGGCAACTG   |
| 22 | 16[83]     | 0[77]    | AGTTGGCCAAATGATTCTGACCACGTATAAGGGATCCCGATTCTAAATC  |
| 23 | 18[167]    | 2[161]   | CCCTTTTAAGAATTAGAAAAACAATAAGTAAAGT                 |
| 24 | 1[126]     | 5[132]   | AAAGCCTTAAGGCGTTCTGACAGAACGCATATAAC                |
| 25 | 4[300]     | 16[301]  | TTCGAGCTTGATAATCAGAAATAATCGTGAGGCATTCCCACA         |
| 26 | 21[98]     | 16[105]  | TTAGGAGCACTAGCATATCAA                              |
| 27 | 1[252]     | 5[258]   | TCAGAGCATAGGAAGTACAAATCATAGTCAGACGT                |
| 28 | 20[69]     | 21[77]   | AGGATGCTCGAAAGGAATTGAG                             |
| 29 | 15[147]    | 3[146]   | TACATTTATAATTATTTGCACTATCAAACCTTAGTAATGGT          |
| 30 | 9[70]      | 23[69]   | CGCCAGATTACATTATTGCAACCCAGTCACGACGTATTTAGA         |
| 31 | 5[315]     | 14[322]  | AAAGGTGGCATCAAAAATCATAATAAAGGAGAGTC                |
| 32 | 10[111]    | 22[112]  | ACTATCGATTTACAAAATCGCGATGTGC                       |
| 33 | 20[300]    | 15[314]  | GGAACAAGATTTAGGAATAGCGTCTGGCCGATTTCGCTTTTG         |
| 34 | 6[300]     | 20[301]  | GATTGCACAAATATCGCGTATAGAGCAAGGCTTTTTCCTAAC         |
| 35 | 17[203]    | 0[196]   | GCAAGGCAGAATCAATGATACCAGTAAGAGCGGGGAGCCCGGAATAGGT  |
| 36 | 10[300]    | 18[294]  | TTCATTGCAATACTTTTGCCAAGCGAGACACTATCGAATTACAAAATA   |
| 37 | 10[279]    | 22[280]  | TCGTACATGTTAGACTGGAGGACGAC                         |
| 38 | 16[104]    | 19[111]  | ACCCTCACACCTTGTGGCCAAGTTAGAATCAGATACCACACCGCGGTCA  |
| 39 | 19[91]     | 21[97]   | AAAACAGACAGTGCAAAGCATATCAATAAATATCT                |
| 40 | 0[230]     | 10[217]  | CGAGAGGGTTGATACACCTCGAGGCAGCCGCCGCTCAGAGC          |
| 41 | 21[266]    | 16[273]  | AGTAGTAAATTGAAGGATATT                              |
| 42 | 23[140]    | 12[147]  | GTTTGAGTCGCTATCAATTACCTGAGATTACGGGA                |
| 43 | 11[168]    | 19[174]  | TTTAGCGATCAGATTTTATTTGGTATTTAAACCAACTGAACAGAGTTAA  |
| 44 | 6[69]      | 20[70]   | AGGAATGTTTGTCTTGACGAGCTGAAAGGATTACACATTTG          |
| 45 | 0[314]     | 8[301]   | ATTAGGCTGAATATAGTTTCATTAGAAT                       |
| 46 | 11[84]     | 19[90]   | ATAACATCCATCACGAAGTGTCCGATTAACGTGCCGCCGCTAGAAGAT   |
| 47 | 19[175]    | 21[188]  | GCCCAATCTATCTTAGCCGAAATAATAATAGCAAACGTAGAA         |
| 48 | 21[224]    | 14[231]  | CATTTGGGGAGGGATCGGTCATAGCCCTACATAGC                |
| 49 | 9[273]     | 0[266]   | TACCGTTAGTCTCAAAAAAAGCCTGTAGGATAGC                 |
| 50 | 23[308]    | 12[315]  | TGGGAACCTCGTAACCGTCAATATGATATGAGGGTA               |

|     |         |         |                                                   |
|-----|---------|---------|---------------------------------------------------|
| 51  | 11[126] | 19[132] | AACAATTACATAAATAAATCGGAAAACAGTCAATATACCTTTGGTAATT |
| 52  | 4[48]   | 21[55]  | AACAGCTCCCTAAAACATCGCTTTGAATCTGTAAGTCGCCCTAACCCCG |
| 53  | 22[111] | 9[104]  | TGCAAGGTAAATCGAACAACTAATAGAAAGGGACTGACGCTATCAGTG  |
| 54  | 12[195] | 23[202] | CGGAACCTTGCCTCAGACTGTATTCATTCAGCGCC               |
| 55  | 14[111] | 18[105] | ATTTTTCCTGAACCTAACACC                             |
| 56  | 0[265]  | 10[259] | AAGCCACACCACCACAATGAGGAGTTAAGCGAAA                |
| 57  | 22[132] | 16[126] | GCTGGCGTATTAATGAACAAAATTCCTGCCTGATT               |
| 58  | 12[314] | 0[315]  | GCTATAATAACTCATATATTTCCATATAACAGTTTTGACC          |
| 59  | 17[119] | 0[112]  | GAATAATAAGAAATGAGAAGATAGCGATTTTCATCTTAAATAAGAATAA |
| 60  | 18[188] | 2[182]  | GCAATAGAATAAGAACAATAGTAATGCAAATATAA               |
| 61  | 9[154]  | 23[153] | ACAAGCAACAGCCATTTATCCCGGTGCGGGCCTCTTAGAATA        |
| 62  | 1[280]  | 10[301] | AACTAAAAATCAGGGGATGCTTTAAACAGTTCAGAAAACGTAATAAATA |
| 63  | 0[111]  | 12[112] | ACACCTGGGTATTTTAGTTAAAGCTTAGTAACCTTTTGAATA        |
| 64  | 8[300]  | 22[301] | GACCATATAGTCAGAAAGCATGAAGAAGTGCAGGAATCGTGAT       |
| 65  | 20[187] | 6[189]  | AAAGGTTTTTTGTAGAGCCTAGGAATCATTACCACACCTTA         |
| 66  | 10[258] | 18[252] | GACAGCATTGAGGAAACGGGTCTAAAACCTTTTGAGACCTTCTACAGAC |
| 67  | 11[315] | 19[321] | TGCCTGAGAACCCTTTTGCGGAAAAACAATTAAGCACAGGCAAAAACAG |
| 68  | 15[315] | 3[314]  | AGAGATCTGGAGCAAACAATATAGCAAATTATGACTTATACA        |
| 69  | 17[147] | 17[146] | ATCAAAACATAAAGGAACCTGGCATGAAATTCATCACTACCAT       |
| 70  | 5[259]  | 23[265] | TAGTAAATTTCAACAATTTTACACTCAGAAAGAGTTTAATTATACCAG  |
| 71  | 22[174] | 16[168] | TTGGGAACAATCAATATAAAAAGTATGTCGGAATA               |
| 72  | 2[223]  | 22[217] | GAAAGTACAGTACCTGAATTTAAGCCAGTTTGCCACTCAGAGGTGCCGG |
| 73  | 21[119] | 1[125]  | TCATCATGAAACCACAGATGAGATTGCTGCTTCTGTCAATATACTAGAA |
| 74  | 0[97]   | 10[91]  | GGTGCCGCCCAAATAGTCTGTCACTTGTGTGTAAT               |
| 75  | 10[216] | 18[210] | CACCACCCGCTCCTCTTTTCTTTCATCTAGCGACCGGAAACTCATCGC  |
| 76  | 2[139]  | 22[133] | AAGACAATAAATTAATCCTTTTCGCTATTAACGGATTCATTTTACGCCA |
| 77  | 14[195] | 18[189] | CTTTAAAACCAGAATGAAATA                             |
| 78  | 16[272] | 19[279] | CATTACCGTAATCTCACTAAATCACGTTGAAAAGATTTTGCTGACCAAC |
| 79  | 0[160]  | 9[153]  | AACGCCAACAAATTGCTTATCCGGTATTTTCGAGA               |
| 80  | 2[55]   | 22[49]  | AGCAGGCAAAGAATCATTAATGTGCGGACTACGTGCGTAATCCGACGGC |
| 81  | 2[244]  | 7[237]  | ACGATCTGAGTTTCATTGTATCGGTTTCGTTGAACA              |
| 82  | 21[203] | 1[209]  | ATCACCGGGAAATTAGCGCGTATAATCAATAAATCGATTGGCAGGTTTA |
| 83  | 23[182] | 11[188] | TTCATATAGGCTGCAGCGTCTTAAATCACGACTTG               |
| 84  | 23[98]  | 8[105]  | ACTCGTACGATTAATACCTACGCCTTGCTGAGTAGAAGAAGTACCGA   |
| 85  | 22[216] | 16[210] | AAACCAGAAAGGGCTATTGACTCACCGATCACCAG               |
| 86  | 9[322]  | 22[322] | GAGAAGCTGCCGGATCAACCGTGTAGAT                      |
| 87  | 11[210] | 19[216] | ACCAGAGGTCAGACCTCATTAACCGTTCAGGAGTGTTGAGTAGACCTGC |
| 88  | 1[112]  | 11[125] | CATAATTATGTGAGTCTTAATTACATTT                      |
| 89  | 9[238]  | 23[237] | GCTTGCTGTAATGCCGGCTACAGCTTTCGGCACCTGTATGC         |
| 90  | 11[70]  | 11[69]  | TTCTTTGTACCGCCAGGTTTTCCTGTGTGTGTAAGCCAATAC        |
| 91  | 22[300] | 23[307] | CTGCCAGTAATAAAACGAACG                             |
| 92  | 0[244]  | 9[237]  | ACCGTAACAGAACCCACGCATAACCGCAAGTATCA               |
| 93  | 21[161] | 1[167]  | ATTACGCGAAACGCCAATCCAAAATAAAGCCGTTATAGAAGCTTACCA  |
| 94  | 7[189]  | 19[202] | TCTTTTGTATCAGCAAGAAACGTCGA                        |
| 95  | 6[188]  | 0[182]  | TCATTCCAGTAATAGGCTTAA                             |
| 96  | 23[154] | 11[167] | AGTTTATTTTGTAGGGCGATTGAATCTTTTGCACGAGGCGT         |
| 97  | 23[70]  | 11[83]  | AGTATTAGACTTTAGGGTTTTTCAGGAAAACAATATATTAGTA       |
| 98  | 0[76]   | 9[69]   | GGAACCCGGCCCAACCGTTGTAGCTGCGCGGTA                 |
| 99  | 5[133]  | 23[139] | TATATGTGAGAGACGTGAATTGTAAAACGTAACAGTTTTGCGTTTAAAA |
| 100 | 1[84]   | 5[90]   | ACCATCATAAAGCATAGAGCTGGAAGGGGGCAAGT               |

|     |         |         |                                                    |
|-----|---------|---------|----------------------------------------------------|
| 101 | 23[203] | 10[196] | AAAGACAGCAAAGCCCGGAACCTCAGAGCCGCCTT                |
| 102 | 22[90]  | 16[84]  | AACGCCACAAACAACGTCAATTATCTAATCTGGTC                |
| 103 | 12[62]  | 0[63]   | GCTTAAGAACCTGTGGGTGCCTCTATCAGGGCGATTAGGTTG         |
| 104 | 5[203]  | 5[202]  | AGTTAATGCTGAGACTCCTCAAGAGAAGGAACGCGCTAAAC          |
| 105 | 19[112] | 14[112] | GTACAAAGTCAGAGTTAACCTCCGGCCAAGACGCTTGCGTAG         |
| 106 | 21[56]  | 14[63]  | CTTCTAAGCACGACTGTAATGAGTAACACGGGGCA                |
| 107 | 2[160]  | 6[154]  | AATTCTGGTAATTTTACCGCA                              |
| 108 | 18[125] | 17[118] | TGAACACCCTGAATTCCTTCT                              |
| 109 | 3[315]  | 6[301]  | TTTCGCATTTGGGGCGGAGGATTAGAGAGCTTAACCAAGCG          |
| 110 | 4[286]  | 18[273] | CGAACGAAGCCCGATCGTTTACCAGATATGACAAGAAAGAGG         |
| 111 | 23[266] | 11[272] | TCAGGACTCGGCCTCTTTTCCCTCAGCAAGGCCG                 |
| 112 | 11[189] | 1[188]  | CGGGAGTTTCGCGCCCAATAGCTCAACA                       |
| 113 | 5[49]   | 23[55]  | TTGCAGCGCAGGGCGGGTGGTAGGGGCTGGTTGGTTAAGTGGTGGTTG   |
| 114 | 1[168]  | 5[174]  | GTATAAATCGCCATGGCATTACAAAAGACAACAT                 |
| 115 | 16[237] | 16[238] | AGTGAATTAGAGCCATGAAACCATCGCAAGCGCAGCTCATTC         |
| 116 | 5[175]  | 23[181] | GTTTCAGCATAAGTCTCAATAAAATGAAAAACGATGGCAACATAGAAAA  |
| 117 | 18[209] | 17[202] | CTGATAAATTGTAAGGCATTA                              |
| 118 | 5[217]  | 23[223] | GCCTATTCAGTGCCTACTGGTTAATCAGGGCATTTAGGTAAAGACATTC  |
| 119 | 23[224] | 12[231] | AACCGATGCTTCTGCCGCCACCTCAAACACCCTT                 |
| 120 | 12[111] | 23[118] | CCAAGTTATCAGGTTTAACTGCCAGAAAGCTTTGCC               |
| 121 | 17[315] | 5[314]  | TCATTCGTTAAAGATGAACGGAGCCCCAAGGCAAACAGCTGA         |
| 122 | 9[105]  | 0[98]   | AGGCCAAATGCGGGAGCTAAAGAAAGCCGGGTCTGA               |
| 123 | 16[69]  | 16[70]  | CAGTTTATTTACGCCAACTCGTCGGTTAAGAATAGAAATCAA         |
| 124 | 23[287] | 10[280] | TCTACGTTTTGAGGTAGCGTCAATCCCCCTCAAGA                |
| 125 | 14[230] | 2[224]  | AGCACCGAATAAGTCAGTCTCAGGCGGATAAGTCTAAATTCTGAAACAT  |
| 126 | 18[293] | 17[286] | GCATGTCAATCATGAATAACG                              |
| 127 | 18[104] | 2[98]   | GCCTGCAAGGTGAGCGCCGCGTCACGCTAACGTGG                |
| 128 | 21[245] | 1[251]  | CTGACGATAATCATCACCAACAAAATACTTCGAGGCATCGCCGCCACCC  |
| 129 | 1[189]  | 11[209] | GTACCGTACTCAGGCTTGATATTACCAGAACCACC                |
| 130 | 16[251] | 0[245]  | AAAGCTGGCTGGCTCCCCAGGAATTGCGCCTTTAGTCAACACCCATGT   |
| 131 | 10[237] | 10[238] | GCGAACCGCCACCCAGCATTGAATATATTTCGGTCGAGGGTA         |
| 132 | 10[132] | 18[126] | AAACATCCGAATTATTTCGCCTATATACAAGAAATAGGAAGGGAATTAAC |
| 133 | 16[300] | 21[286] | TTCAACTAATGCAGATACACCGATTTCAT                      |
| 134 | 18[251] | 2[245]  | CAGGCGCAGACGGTGC GGAGTGTCTTTCTAGCGTA               |
| 135 | 10[174] | 18[168] | TTGCTATTACCAACCAGTTACAAATAAGATAGCAGAGCAGATACCGAAG  |
| 136 | 12[146] | 0[147]  | GAAACAATAATTAATTAATGGATCATATGCGTTATACATACC         |
| 137 | 10[90]  | 18[84]  | ATCCAGAAACGCTCCTGAAATACGACCAAGAACCCAAAATCTCACGCTG  |
| 138 | 19[203] | 14[196] | AATCCGCACAGTGCCCGTATGGCTTTTGGAGTTTGC               |
| 139 | 18[237] | 5[237]  | AAAGTACAACGGAGTACTTAGACGGGGTTCGGAACCTATTAG         |
| 140 | 8[104]  | 1[111]  | GTAAAAGCAAGTTTTTGGAAAT                             |
| 141 | 11[154] | 11[153] | AGAACGCCAGCTACACAAAAGAAGATGAATTACCTTTTCTA          |
| 142 | 16[167] | 0[161]  | CCCAAAAAAAGTACCTTTACCATGTAGAACCAAGAGGCAGAATTTAAC   |
| 143 | 19[280] | 4[287]  | TTTATGTACCCCGGTTCAAAG                              |
| 144 | 11[273] | 1[279]  | CTTTTGCTCATAGTTGCGCCGCTCATTTTCTATGC                |
| 145 | 12[279] | 23[286] | AAAATGAAACGACGATAAAAAACAGGTAAGAAAAA                |
| 146 | 0[279]  | 12[280] | TTAAAAGGCAGAGGTCATTTTGATTAAGTACCCTGTAATAGT         |
| 147 | 18[83]  | 2[77]   | AGAGCCACACCAGCACAGGGCGGGCGCTAAGAAAG                |
| 148 | 14[62]  | 2[56]   | CGAATATTTTTCTTCCAGCTGAGCCCGAGATAGAAAGCTGGTTTGCCCC  |
| 149 | 10[321] | 11[314] | GTCAAATCACCATCAATGCAA                              |
| 150 | 11[252] | 19[258] | CTTGCAGCAACAACCTGAATTTAAAAGGAGAATAATAGTTTCACAATCAT |

|     |         |         |                                                          |
|-----|---------|---------|----------------------------------------------------------|
| 151 | 1[294]  | 4[301]  | GTCTGGAAATGCTGGGCTTAGAGTACCTAAACTCCAACAGGTGATTTAA        |
| 152 | 21[287] | 1[293]  | CAGTTGACATTATTCAAAATGAGGGGGACTATTAATCAAAGTACGGT          |
| 153 | 23[56]  | 12[63]  | TGAATTCTGTAAAAATGGTCATAGCTCCGGACAGG                      |
| 154 | 23[238] | 11[251] | GATTTTAAGAACTGTCCAGGCCAGAGGCTTCGGAACGCTGAGG              |
| 155 | 12[230] | 0[231]  | ATTAGCGAATGGAAGGAGGTTAGAACC GCCACCCTCAGCCGT              |
| 156 | 16[209] | 21[202] | TAGCACCATTACAAGTGAATT                                    |
| 157 | 18[272] | 2[266]  | ACAGATGCCGAATAACAACACTGAATTTTCCACAG                      |
| 158 | 5[147]  | 4[154]  | GATGCCAGACGCGTAATATC                                     |
| 159 | 2[97]   | 22[91]  | CGAGAAATGACGGGCAGGAGGTTTTATACAATCGTATGGAAAGTTGGGT        |
| 160 | 16[125] | 21[118] | GTTTGGATTATAAAGGAATTA                                    |
| 161 | 5[91]   | 23[97]  | GTAGCGGCTTAATGTTTCTCCAGAGATGTAATAATTAGAGCTTCGACA         |
| 162 | 23[119] | 10[112] | CGAACGTAAAGGGGGCAGAGGAAGAAAACAAAAA                       |
| 163 | 4[153]  | 18[154] | CCATCCAGAGAGATAACCCACTAAAACA                             |
| 164 | 0[146]  | 10[133] | GACCGTGTGATAAAGTTTAGTAAACAGTTCATTTGATGAAAC               |
| 165 | 22[321] | 17[314] | GGGCGCAAACGGCAACCCGTCTTCTGCCATCAAAAATAATAGGAGAA          |
| 166 | 19[133] | 21[139] | GAGCGCTACGGGAGTTAGAACATATAATATTATCA                      |
| 167 | 2[76]   | 6[70]   | CGAAAGGGGGAGCCTTTAGAC                                    |
| 168 | 18[69]  | 5[69]   | GCACAGACAATATTCATTA AACAGTGAAAGCGGTCCACGCG               |
| 169 | 8[41]   | 5[48]   | ACTCACAACGTCAAAGGGCGATTGGA ACTAAATCAGAAAATCGAGAGAG       |
| 170 | 19[259] | 21[265] | AAGGGAAAACGGTGATCAAGACAAATCACAGAACG                      |
| 171 | 5[119]  | 5[118]  | TTGGGTTGAGAAA ACTTTTTCAAATACGGCGCGTA ACTTAGG             |
| 172 | 0[62]   | 10[49]  | AGTGTGTTCCAGTAAAACCGTAATGAGCATAAAGAAATTGT                |
| 173 | 18[153] | 5[146]  | GGGAAGCGCATTAGAATATCATAGGTCTAAATGCT                      |
| 174 | 8[348]  | 1[345]  | ttttttGCAAGGATAAAACAATTCTGCttttttt                       |
| 175 | 5[22]   | 2[15]   | ttttttCCGCCTGGCCCTCTGTTTGATGGTGGTTCCGttttttt             |
| 176 | 9[18]   | 12[15]  | ttttttTTGCGCTCAGATAAAGACGGAttttttt                       |
| 177 | 14[345] | 7[348]  | ttttttTCATTGCCTCCTCAGAGCATAttttttt                       |
| 178 | 1[15]   | 8[18]   | ttttttACGTGGACTCCATTAATTGCGttttttt                       |
| 179 | 6[41]   | 0[15]   | CCAACGCTCCCTTAAAGAGTCCACTATTAAGAttttttt                  |
| 180 | 20[348] | 15[345] | ttttttTTAAATGTGAGCGCTATCAGGttttttt                       |
| 181 | 3[15]   | 6[18]   | ttttttAAATCGGCAAAGCGGGGAGAttttttt                        |
| 182 | 6[348]  | 3[345]  | ttttttAAGCTAAATCGGAATAACCTGttttttt                       |
| 183 | 12[345] | 9[348]  | ttttttATAAATTA ACTTTATTTCAACTttttttt                     |
| 184 | 13[15]  | 22[18]  | ttttttGGATCCCCGGGTCTCAGGAGAttttttt                       |
| 185 | 21[18]  | 9[41]   | ttttttTTATGACAATGTCCCGTGCTGAAGAACTCTTTACCTCCTGCCCG       |
| 186 | 15[322] | 23[348] | TACAAAGGAGTAACGGATTGACCGTAATGGGATttttttt                 |
| 187 | 23[18]  | 10[22]  | ttttttAGCCAGGGTGGATGTTAAGCTTTACCGAGCTCACAATTCCACTttttttt |
| 188 | 11[22]  | 7[48]   | ttttttACAACATACGAGCCGGAAGTGAGCTACTTTCCAGAATCGGGGCGCCA    |
| 189 | 0[345]  | 10[322] | ttttttGAACGAGTAGATTTAGTGATTCCATTTT TAGTAATGTGGAGACA      |
| 190 | 22[348] | 13[345] | ttttttAGGTCACGTTGGTTCTAGCTGttttttt                       |
| 191 | 22[48]  | 16[22]  | CAGTGCCCTTCTAATCCTTAGCCAAAATGGAGTGACTCTATGATACCttttttt   |
| 192 | 19[22]  | 4[22]   | ttttttGCGAACTGATAGGATTGCCCTTCAttttttt                    |
| 193 | 17[42]  | 18[22]  | CTGCCATGGCTATTAGTCTTTAATGCttttttt                        |
| 194 | 7[18]   | 14[15]  | ttttttGGCGGTTTGGCATTTCACATAttttttt                       |
| 195 | 19[322] | 21[348] | GAAGATTTATTTTGCAATAAAGGAACGTAGCCAGCTTTCATCAACAAttttttt   |
| 196 | 15[15]  | 20[18]  | ttttttAATCATTTCTCCTTGCAACCttttttt                        |
| 197 | 17[22]  | 7[41]   | ttttttGACAGTGCGGCCGCTGACCGTATTG                          |
| 198 | 2[345]  | 6[322]  | ttttttTTTAGCTATATTTTCAAATGGTCTTG TACC                    |
| 199 | 18[352] | 19[352] | ttttttAAATTGTAAACGTTAAGTATAAGCAAATATTTttttttt            |
| 200 | 10[352] | 11[352] | ttttttAAGGGTGAGAAAGGCCGTAGGTAAAGATTCAAAttttttt           |
| 201 | 16[352] | 17[352] | ttttttTCATTTT TTAACCAATTTTTTGTAAATCAGCttttttt            |
| 202 | 4[352]  | 5[352]  | ttttttAGCATTAACATCCAATTTCTACTAATAGTAGTttttttt            |
